# Supplementary material for: Assessing the Safety and Therapeutic Efficacy of Cannabidiol Lipid Nanoparticles in Alleviating Metabolic and Memory Impairments and Hippocampal Histopathological Changes in Diabetic Parkinson’s Rats
Source: MDPI journal article supplement (doi:10.3390/pharmaceutics16040514), 2024-04-08
Supplement: s1 [file s1]

## Supplemental data

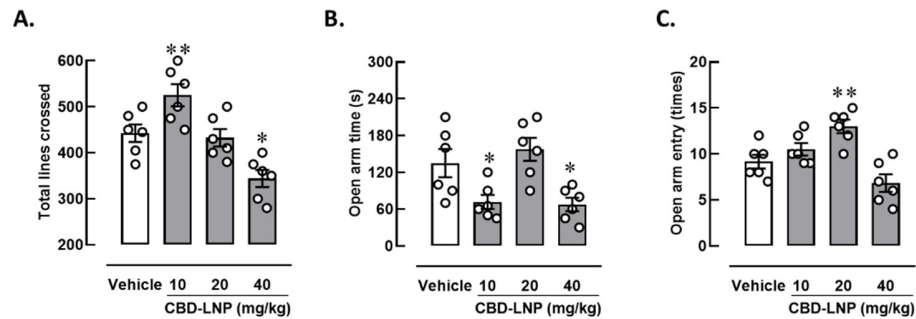

**Supplementary Figure S1.** Effects of CBD-LNP on locomotor activity and anxiety-like behaviors in normal male rats. (A) Number of total line crossed in the open filed test (B) open arm entry and (C) open arm time in the elevated-plus maze. Data are presented as mean  $\pm$  SEM (n=6 rats/group). \* $P < 0.05$ , \*\* $P < 0.01$  compared to vehicle-treated control group.

**Supplementary Table S1.** Metabolic parameters at baseline and after diabetic induction

| Metabolic parameters          | Control group      |                      |                                 | Diabetic group     |                                  |                       |
|-------------------------------|--------------------|----------------------|---------------------------------|--------------------|----------------------------------|-----------------------|
|                               | Baseline           | Fed normal food diet | 0.01 M sodium citrate injection | Baseline           | Pre-treatment with high fat diet | STZ injection         |
|                               | 9-week-old         | 10-week-old          | 11-week-old                     | 9-week-old         | 10-week-old                      | 11-week-old           |
| Body weight (g)               | 228.00 $\pm$ 4.01  | 250.75 $\pm$ 5.10    | 283.63 $\pm$ 2.21               | 231.13 $\pm$ 3.56  | 263.50 $\pm$ 6.86                | 300.00 $\pm$ 4.33**   |
| Triglycerides (mg/dL)         | 89.88 $\pm$ 2.97   | 89.13 $\pm$ 4.65     | 90.88 $\pm$ 2.84                | 88.13 $\pm$ 3.89   | 90.00 $\pm$ 2.84                 | 124.00 $\pm$ 6.74***  |
| Total cholesterol (mg/dL)     | 74.38 $\pm$ 3.95   | 76.88 $\pm$ 4.00     | 79.13 $\pm$ 3.02                | 75.00 $\pm$ 2.67   | 77.25 $\pm$ 3.42                 | 139.38 $\pm$ 16.41**  |
| Fasting blood glucose (mg/dL) | 98.75 $\pm$ 3.98   | 105.63 $\pm$ 2.49    | 107.50 $\pm$ 5.26               | 98.13 $\pm$ 2.49   | 106.88 $\pm$ 3.89                | 243.38 $\pm$ 17.97*** |
| Insulin ( $\mu$ U/L)          | 29.23 $\pm$ 1.01   | 29.60 $\pm$ 1.07     | 29.35 $\pm$ 0.98                | 29.12 $\pm$ 1.06   | 29.15 $\pm$ 1.68                 | 22.22 $\pm$ 1.99**    |
| HOMA-IR index                 | 7.35 $\pm$ 0.42    | 7.50 $\pm$ 0.36      | 7.38 $\pm$ 0.34                 | 7.44 $\pm$ 0.27    | 7.68 $\pm$ 0.56                  | 12.59 $\pm$ 1.25***   |
| HOMA- $\beta$ index           | 284.13 $\pm$ 18.89 | 281.69 $\pm$ 24.01   | 283.60 $\pm$ 24.64              | 282.74 $\pm$ 22.53 | 246.69 $\pm$ 15.10               | 51.05 $\pm$ 6.65***   |

Data are presented as mean  $\pm$  SEM (n=8 rats/group). HOMA-IR (Homeostatic Model Assessment for insulin resistance), HOMA- $\beta$  (Homeostatic Model Assessment estimates steady state beta cell function). \*\* $P < 0.01$ , \*\*\*  $< 0.001$  compared to baseline.
